# Supplementary material for: Model Comparison of Heritability Enrichment Analysis in Livestock Population
Source: MDPI journal article supplement (doi:10.3390/genes13091644), 2022-09-13
Supplement: s1 [file s1]

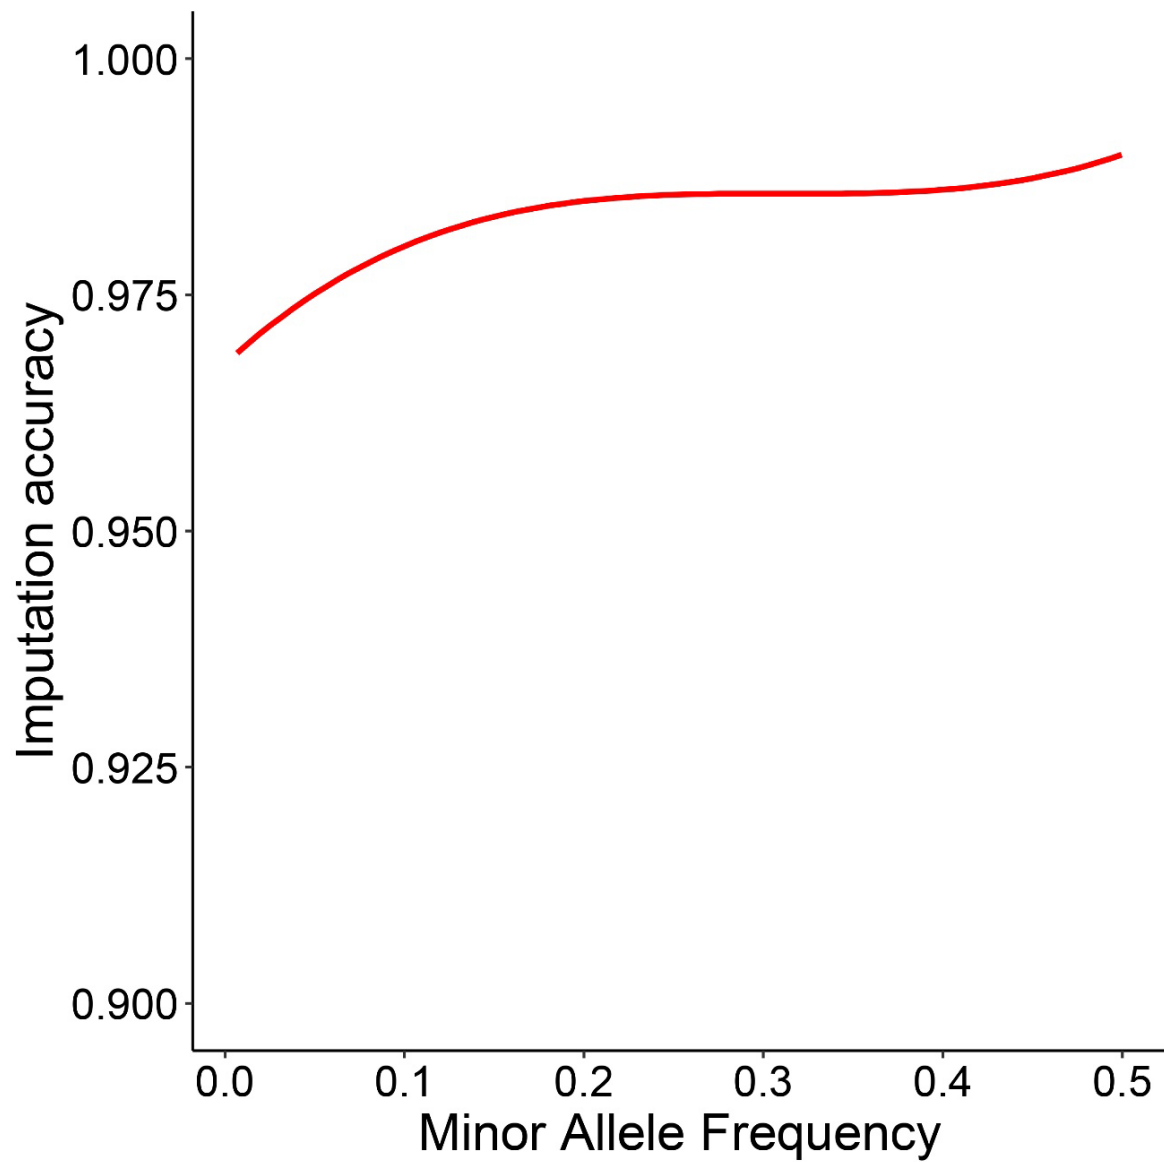

**Figure S1.** The imputed accuracy of genotype imputation for different minor allele frequency range.

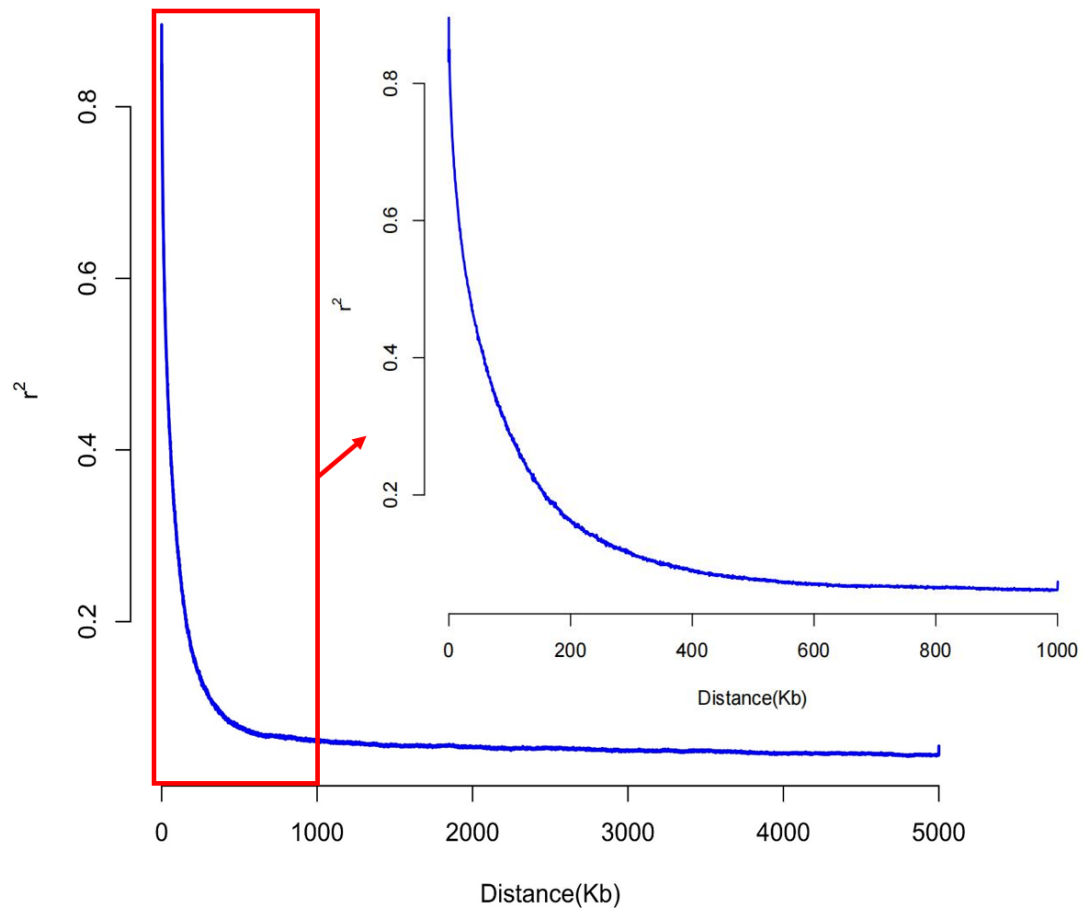

**Figure S2. LD decay for the German Holstein population.**

**Table S1. Models for estimating heritability enrichment.**

| Model           | GRM                                                | Per-SNP heritability                                                                                       |
|-----------------|----------------------------------------------------|------------------------------------------------------------------------------------------------------------|
| VanRaden model  | $\frac{MM^T}{2 \sum_1^m p_i(1-p_i)}$               | $\text{var}(\beta_i) \propto p_i(1-p_i)$                                                                   |
| GCTA model      | $\frac{MM^T}{\sum_1^m 2p_i(1-p_i)}$                | $\text{var}(\beta_i) \propto 1$                                                                            |
| $\alpha$ -model | $\frac{MM^T}{2 \sum_1^m [p_i(1-p_i)]^{1+\alpha}}$  | $\text{var}(\beta_i) \propto (p_i(1-p_i))^{1+\alpha}$<br>$\alpha = -1.25, -1, -0.75, -0.5, -0.25, 0, 0.25$ |
| LDAK model      | $G = \frac{MWM^T}{2 \sum_1^m [p_i(1-p_i)]^{0.75}}$ | $\text{var}(\beta_i) \propto (p_i(1-p_i))^{0.75} w_i^{*1}$                                                 |

$$^1w_i^* = w_i \frac{m'}{\sum_i w_i}$$

**Table S2. Heritability estimation for different models.**

| Model                                          | Phenotype | $h_F^2$ | $h^2$ |
|------------------------------------------------|-----------|---------|-------|
| VanRaden model( $\alpha=0$ )                   | T1        | 0.246   | 0.776 |
| VanRaden model( $\alpha=0$ )                   | T2        | 0.258   | 0.794 |
| VanRaden model( $\alpha=0$ )                   | T3        | 0.101   | 0.542 |
| GCTA model( $\alpha=-1$ )                      | T1        | 0.263   | 0.803 |
| GCTA model( $\alpha=-1$ )                      | T2        | 0.262   | 0.809 |
| GCTA model( $\alpha=-1$ )                      | T3        | 0.258   | 0.717 |
| $\alpha$ -model( $\alpha=-1.25$ )              | T1        | 0.261   | 0.807 |
| $\alpha$ -model( $\alpha=-1.25$ )              | T2        | 0.258   | 0.808 |
| $\alpha$ -model( $\alpha=-1.25$ )              | T3        | 0.275   | 0.765 |
| $\alpha$ -model( $\alpha=-0.75$ )              | T1        | 0.261   | 0.797 |
| $\alpha$ -model( $\alpha=-0.75$ )              | T2        | 0.264   | 0.806 |
| $\alpha$ -model( $\alpha=-0.75$ )              | T3        | 0.220   | 0.662 |
| $\alpha$ -model( $\alpha=-0.5$ )               | T1        | 0.257   | 0.789 |
| $\alpha$ -model( $\alpha=-0.5$ )               | T2        | 0.263   | 0.802 |
| $\alpha$ -model( $\alpha=-0.5$ )               | T3        | 0.171   | 0.611 |
| $\alpha$ -model( $\alpha=-0.25$ )              | T1        | 0.251   | 0.782 |
| $\alpha$ -model( $\alpha=-0.25$ )              | T2        | 0.261   | 0.798 |
| $\alpha$ -model( $\alpha=-0.25$ )              | T3        | 0.129   | 0.571 |
| $\alpha$ -model( $\alpha=0.25$ )               | T1        | 0.240   | 0.770 |
| $\alpha$ -model( $\alpha=0.25$ )               | T2        | 0.255   | 0.790 |
| $\alpha$ -model( $\alpha=0.25$ )               | T3        | 0.083   | 0.522 |
| LDAK model( $\alpha=-0.25$ , LD window=1kb)    | T1        | 0.256   | 0.783 |
| LDAK model( $\alpha=-0.25$ , LD window=1kb)    | T2        | 0.266   | 0.799 |
| LDAK model( $\alpha=-0.25$ , LD window=1kb)    | T3        | 0.135   | 0.573 |
| LDAK model( $\alpha=-0.25$ , LD window=5kb)    | T1        | 0.259   | 0.786 |
| LDAK model( $\alpha=-0.25$ , LD window=5kb)    | T2        | 0.272   | 0.800 |
| LDAK model( $\alpha=-0.25$ , LD window=5kb)    | T3        | 0.148   | 0.580 |
| LDAK model( $\alpha=-0.25$ , LD window=50kb)   | T1        | 0.266   | 0.788 |
| LDAK model( $\alpha=-0.25$ , LD window=50kb)   | T2        | 0.276   | 0.803 |
| LDAK model( $\alpha=-0.25$ , LD window=50kb)   | T3        | 0.147   | 0.591 |
| LDAK model( $\alpha=-0.25$ , LD window=100kb)  | T1        | 0.258   | 0.789 |
| LDAK model( $\alpha=-0.25$ , LD window=100kb)  | T2        | 0.270   | 0.803 |
| LDAK model( $\alpha=-0.25$ , LD window=100kb)  | T3        | 0.133   | 0.597 |
| LDAK model( $\alpha=-0.25$ , LD window=500kb)  | T1        | 0.262   | 0.796 |
| LDAK model( $\alpha=-0.25$ , LD window=500kb)  | T2        | 0.273   | 0.808 |
| LDAK model( $\alpha=-0.25$ , LD window=500kb)  | T3        | 0.089   | 0.625 |
| LDAK model( $\alpha=-0.25$ , LD window=5000kb) | T1        | 0.329   | 0.799 |
| LDAK model( $\alpha=-0.25$ , LD window=5000kb) | T2        | 0.347   | 0.807 |
| LDAK model( $\alpha=-0.25$ , LD window=5000kb) | T3        | 0.070   | 0.684 |
